# Supplementary material for: Safety and efficacy of cannabidiol-cannabidiolic acid rich hemp extract in the treatment of refractory epileptic seizures in dogs
Source: PubMed Central journal article supplement (PMC9372618; doi:10.3389/fvets.2022.939966), 2022-07-29
Supplement: Table_1.pdf [file Table_1.pdf]

*Supplementary Data: CBD/CBDA-rich hemp trial survey*

Date: \_\_\_\_\_

Owner Name: \_\_\_\_\_

Visit (1-7): \_\_\_\_\_

Dog Name: \_\_\_\_\_

**Hemp based nutraceutical epilepsy and quality of life survey**

**Please answer these questions based on the last three months of treatment as it relates to adverse events, quality of life and seizure management.**

**Part A: For part A this scoring is based on the Likert scoring system which is:**

**1 = a lot more; 2 = a little more; 3 = no change; 4 = a bit less; 5 = a lot less.**

**In the past three months the clinical signs below regarding potential adverse events during treatment were:**

1. Appetite: \_\_\_\_\_
2. Weight gain: \_\_\_\_\_
3. Thirst/drinking: \_\_\_\_\_
4. Urination: \_\_\_\_\_
5. Lethargy/somnolence: \_\_\_\_\_
6. Ataxia (uncoordinated gait; "drunken when walking"): \_\_\_\_\_
7. Restlessness or anxiety: \_\_\_\_\_
8. Vomiting: \_\_\_\_\_
9. Diarrhea: \_\_\_\_\_

**For Part B and C the Likert Scoring system is based on:**

**1 = strongly disagree; 2 = disagree; 3 = neutral; 4 = agree ; 5 = strongly agree.**

**B: Owners opinion about seizure severity and frequency**

1. In the last three months the severity of seizures (duration of events) was acceptable: \_\_\_\_\_
2. In the last three months the frequency of seizures was acceptable: \_\_\_\_\_
3. In the last three months I found that overall the management of my dog's seizures was acceptable: \_\_\_\_\_

**C: Quality of Life during treatment**

1. In the past three months; the treatment with the nutraceutical has improved my dogs quality of life: \_\_\_\_\_

*Supplemental Table 1: ASM that dogs were taken prior to enrolment and any documented changes in medications during placebo or CBD/CBDA-rich hemp extract oil treatments.*

*Key: Pheno – phenobarbital; Zonis – zonisamide; Levi – levetiracetum; Topir - topiramate*

| DOG | Pheno | Zonis | Levi | KBr | Topir | Drug $\Delta$ placebo | Drug $\Delta$ CBD |
|-----|-------|-------|------|-----|-------|-----------------------|-------------------|
| 1   | No    | Yes   | Yes  | No  | No    | None                  | None              |
| 2   | No    | Yes   | Yes  | Yes | No    | None                  | None              |
| 3   | Yes   | No    | Yes  | Yes | No    | Increase Pheno        | Decrease Pheno    |
| 4   | Yes   | Yes   | No   | Yes | No    | None                  | None              |
| 5   | No    | Yes   | Yes  | Yes | No    | None                  | None              |
| 6   | No    | No    | Yes  | Yes | Yes   | Decrease Pheno        | Decrease Pheno    |
| 7   | Yes   | Yes   | Yes  | Yes | No    | None                  | None              |
| 8   | No    | Yes   | Yes  | Yes | No    | None                  | None              |
| 9   | Yes   | Yes   | Yes  | Yes | No    | None                  | None              |
| 10  | Yes   | Yes   | Yes  | Yes | No    | None                  | None              |
| 11  | Yes   | Yes   | Yes  | Yes | No    | None                  | None              |
| 12  | Yes   | No    | Yes  | Yes | No    | None                  | None              |
| 13  | Yes   | Yes   | Yes  | Yes | No    | None                  | Increase KBr      |
| 14  | Yes   | Yes   | Yes  | Yes | No    | Inc. KBr/Dec Pheno    | Dec. Pheno        |
